# Supplementary figures and images for: Flow battery electroanalysis 3: online kinetics measurements using ultramicroelectrodes in channel flow
Source: Royal Society of Chemistry journal article supplement (doi:10.1039/d2ta02132c), 2022-01-01

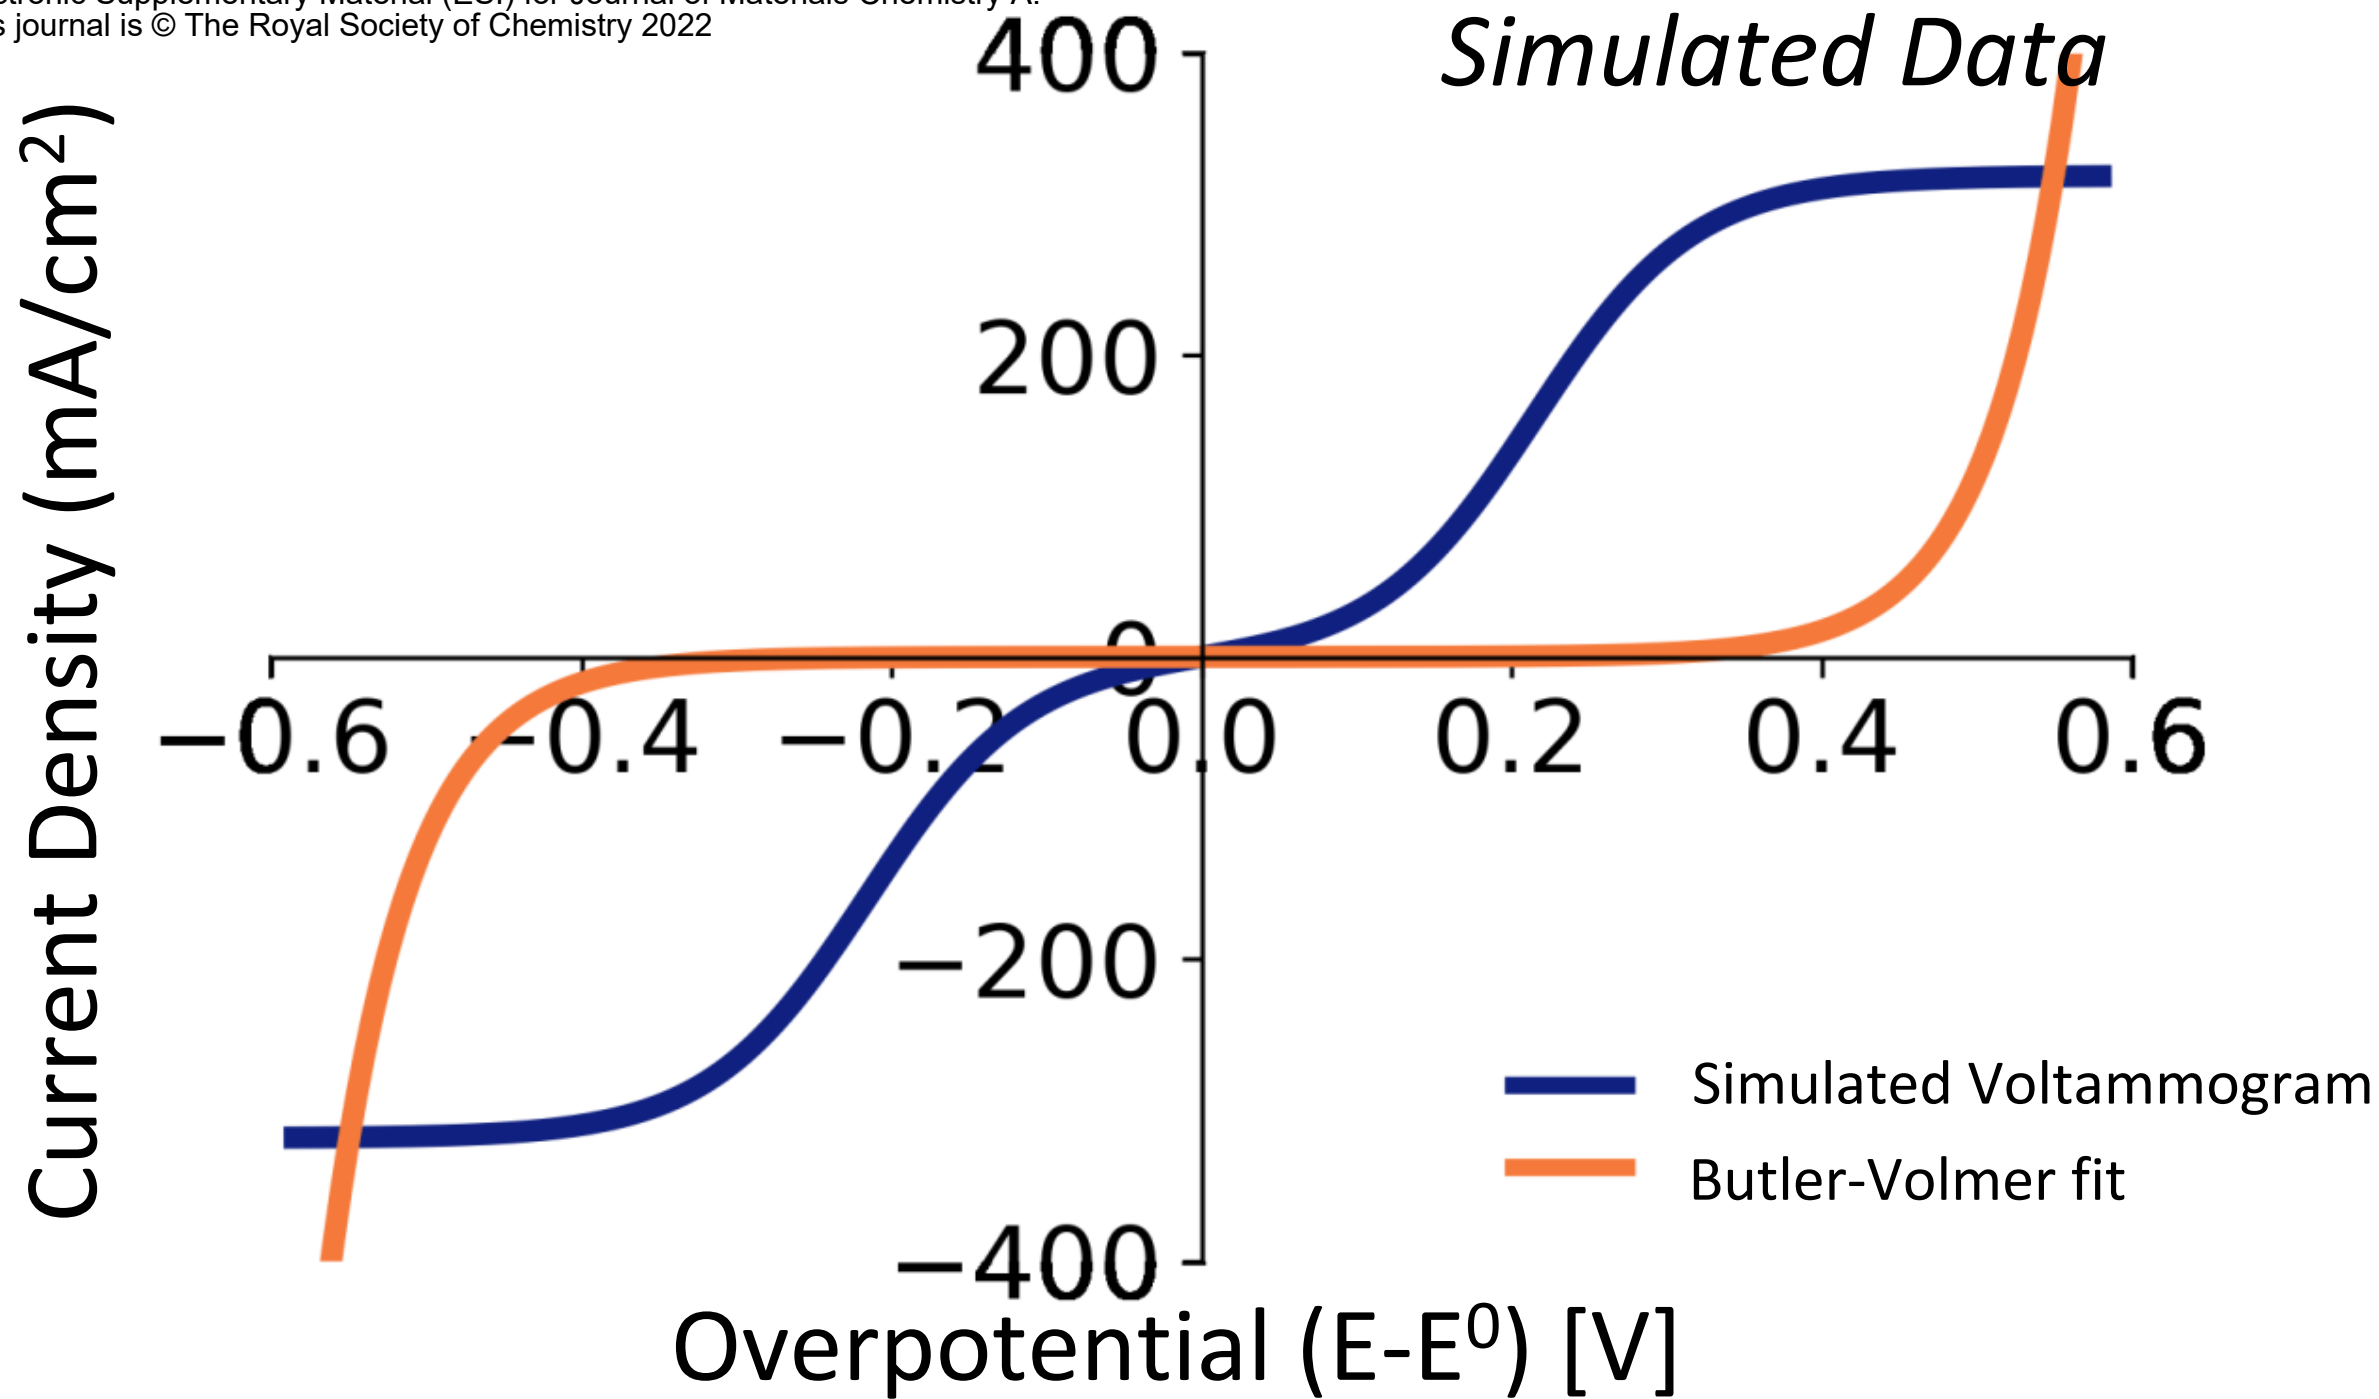

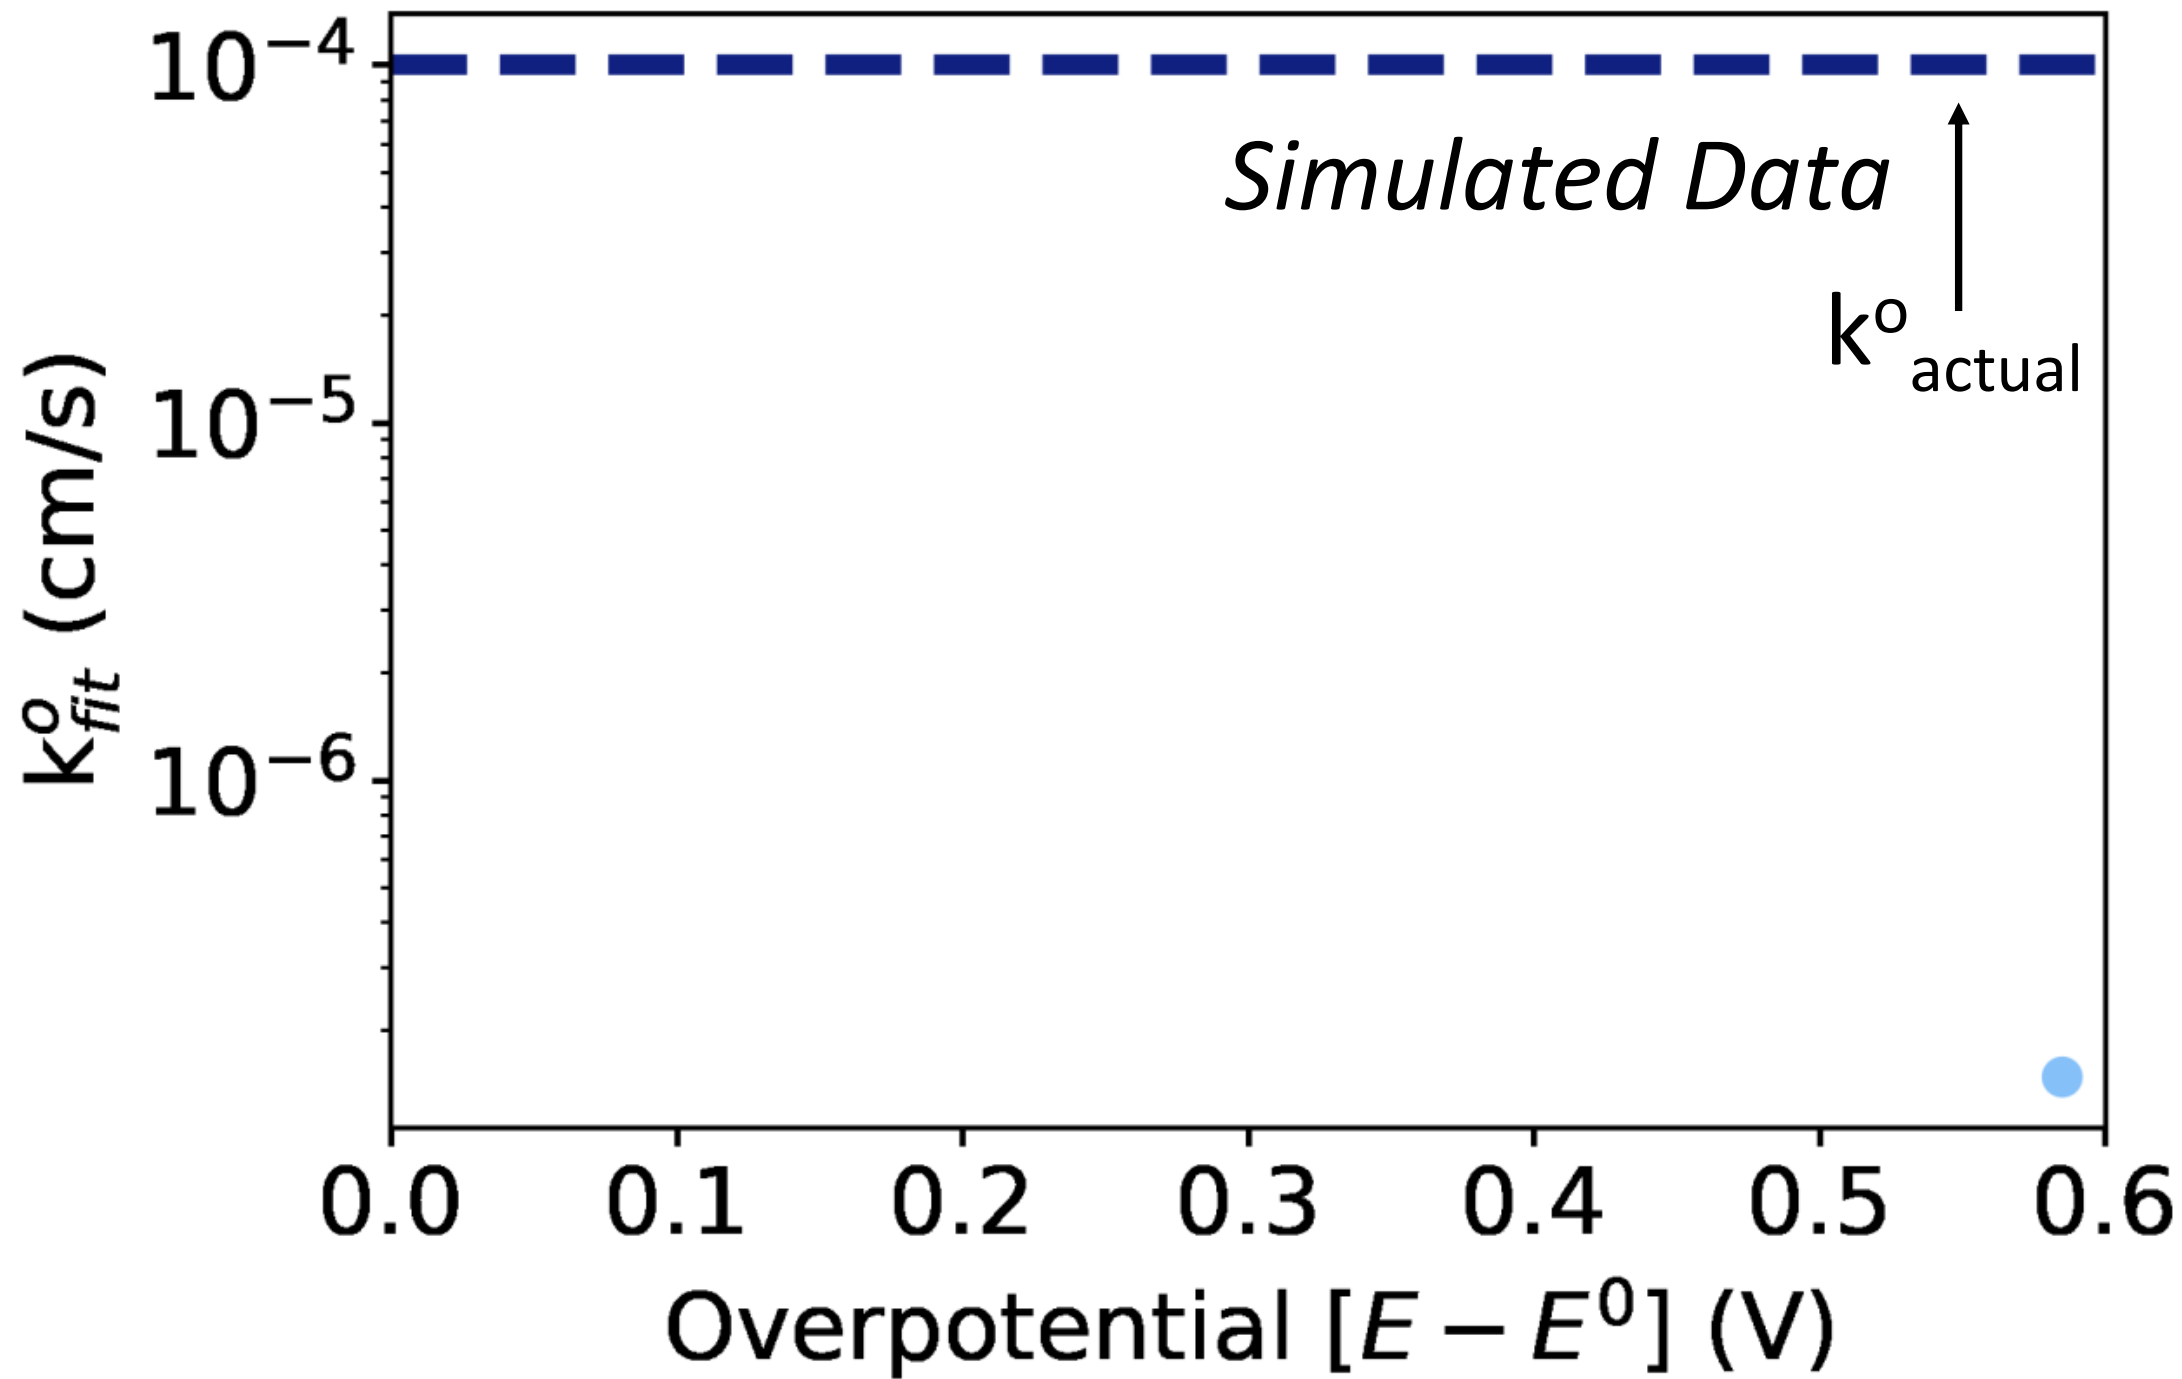

# *Experimental Data*

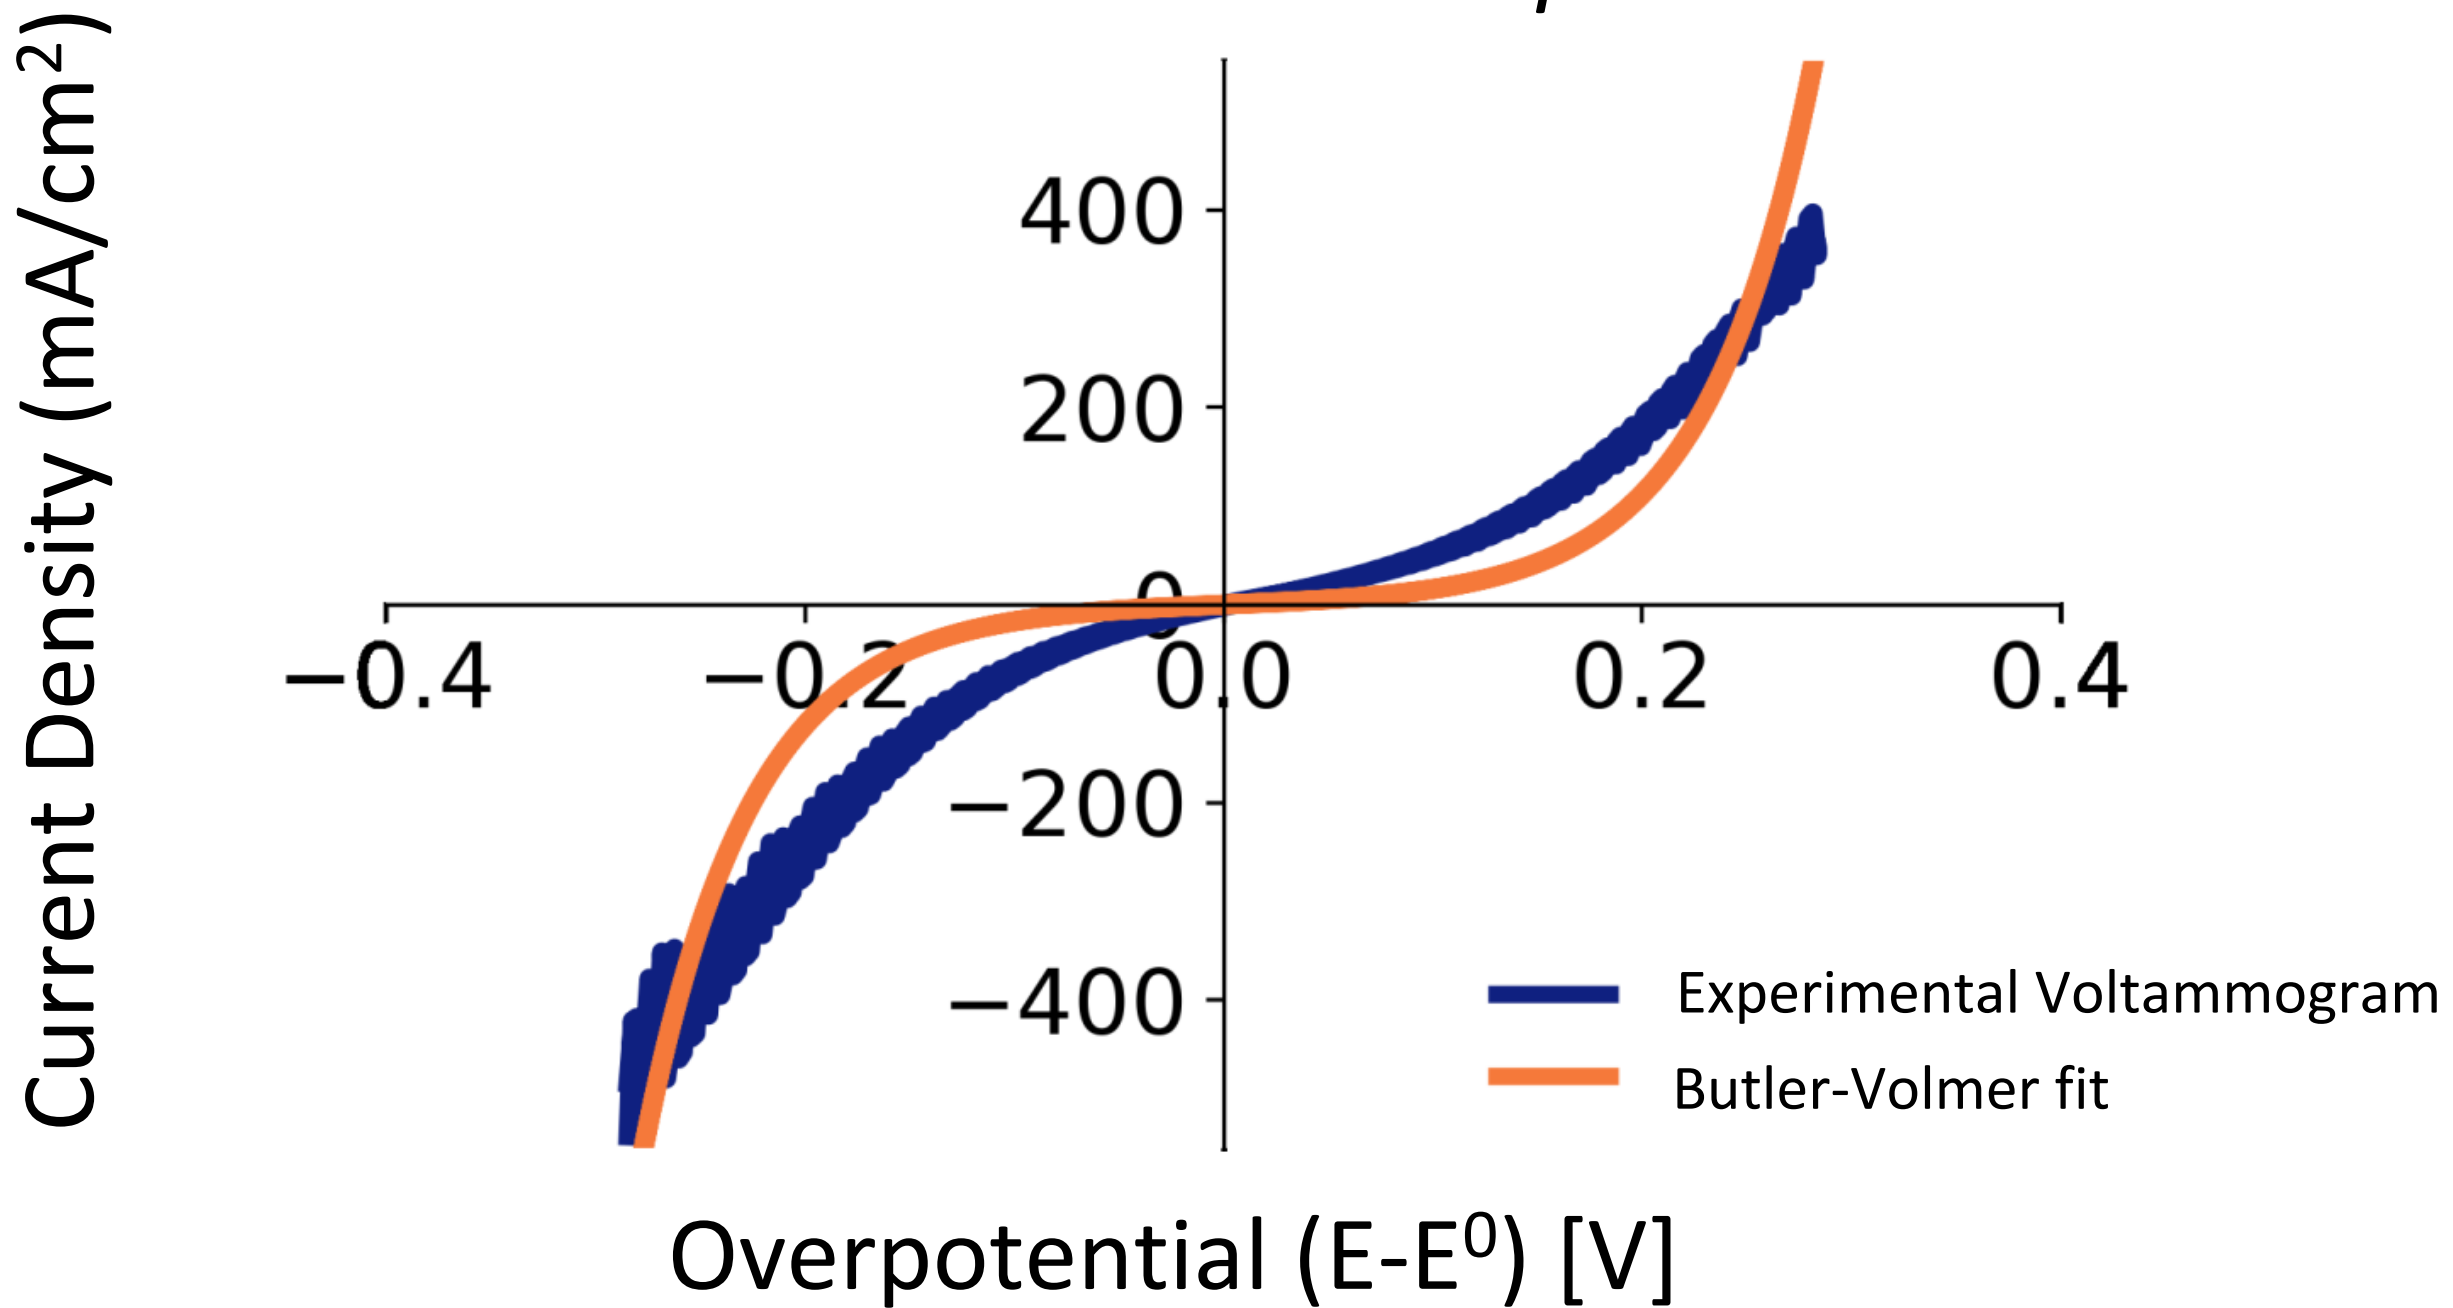

*Experimental Data*

$k_{fit}^0$  (cm/s)

$10^{-4}$

0.00 0.05 0.10 0.15 0.20 0.25 0.30

Overpotential [ $E - E^0$ ] (V)

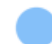

Supplement: d2ta02132c1.pdf [file d2ta02132c1.pdf]
